# Supplementary material for: Structure of the endocytic adaptor complex reveals the basis for efficient membrane anchoring during clathrin-mediated endocytosis
Source: Nat Commun. 2021 May 17;12:2889. doi: 10.1038/s41467-021-23151-7 (PMC8129110; doi:10.1038/s41467-021-23151-7)
Supplement: Supplementary file 1 — Supplementary Information [file 41467_2021_23151_MOESM1_ESM.pdf]

## Supplementary Information

### **Structure of the endocytic adaptor complex reveals the basis for efficient membrane anchoring during clathrin-mediated endocytosis**

Javier Lizarrondo<sup>1</sup>, David P. Klebl<sup>2</sup>, Stephan Niebling<sup>1</sup>, Marc Abella<sup>3</sup>, Martin A. Schroer<sup>1</sup>, Haydyn D.T. Mertens<sup>1</sup>, Katharina Veith<sup>1</sup>, Roland Thuenauer<sup>4</sup>, Dmitri I. Svergun<sup>1</sup>, Michal Skruzny<sup>3</sup>, Frank Sobott<sup>5,6</sup>, Stephen P. Muench<sup>2</sup> and Maria M. Garcia-Alai<sup>1,7</sup>

1 European Molecular Biology Laboratory, Hamburg Outstation, Hamburg, Germany.

2 School of Biomedical Sciences, Faculty of Biological Sciences & Astbury Centre for Structural and Molecular Biology, University of Leeds, Leeds, UK. School of Biomedical Sciences, Faculty of Biological Sciences, University of Leeds, Leeds, UK.

3 Department of Systems and Synthetic Microbiology, Max Planck Institute for Terrestrial Microbiology and LOEWE Center for Synthetic Microbiology (SYNMIKRO), Marburg, Germany

4 Technology Platform Microscopy and Image Analysis, Heinrich Pette Institute, Leibniz Institute for Experimental Virology, Hamburg, Germany

5 School of Molecular and Cellular Biology, Faculty of Biological Sciences & Astbury Centre for Structural and Molecular Biology, University of Leeds, Leeds, UK.

6 Department of Chemistry, Biomolecular & Analytical Mass Spectrometry group, University of Antwerp, Antwerp, Belgium.

7 Centre for Structural Systems Biology, Notkestrasse 85, D-22607 Hamburg, Germany.

Lizarrondo et. al., 2021

Javier Lizarrondo and David P. Klebl contributed equally to this work. Correspondence and requests for materials should be addressed to M.G.A. (email: [garcia@embl-hamburg.de](mailto:garcia@embl-hamburg.de)).

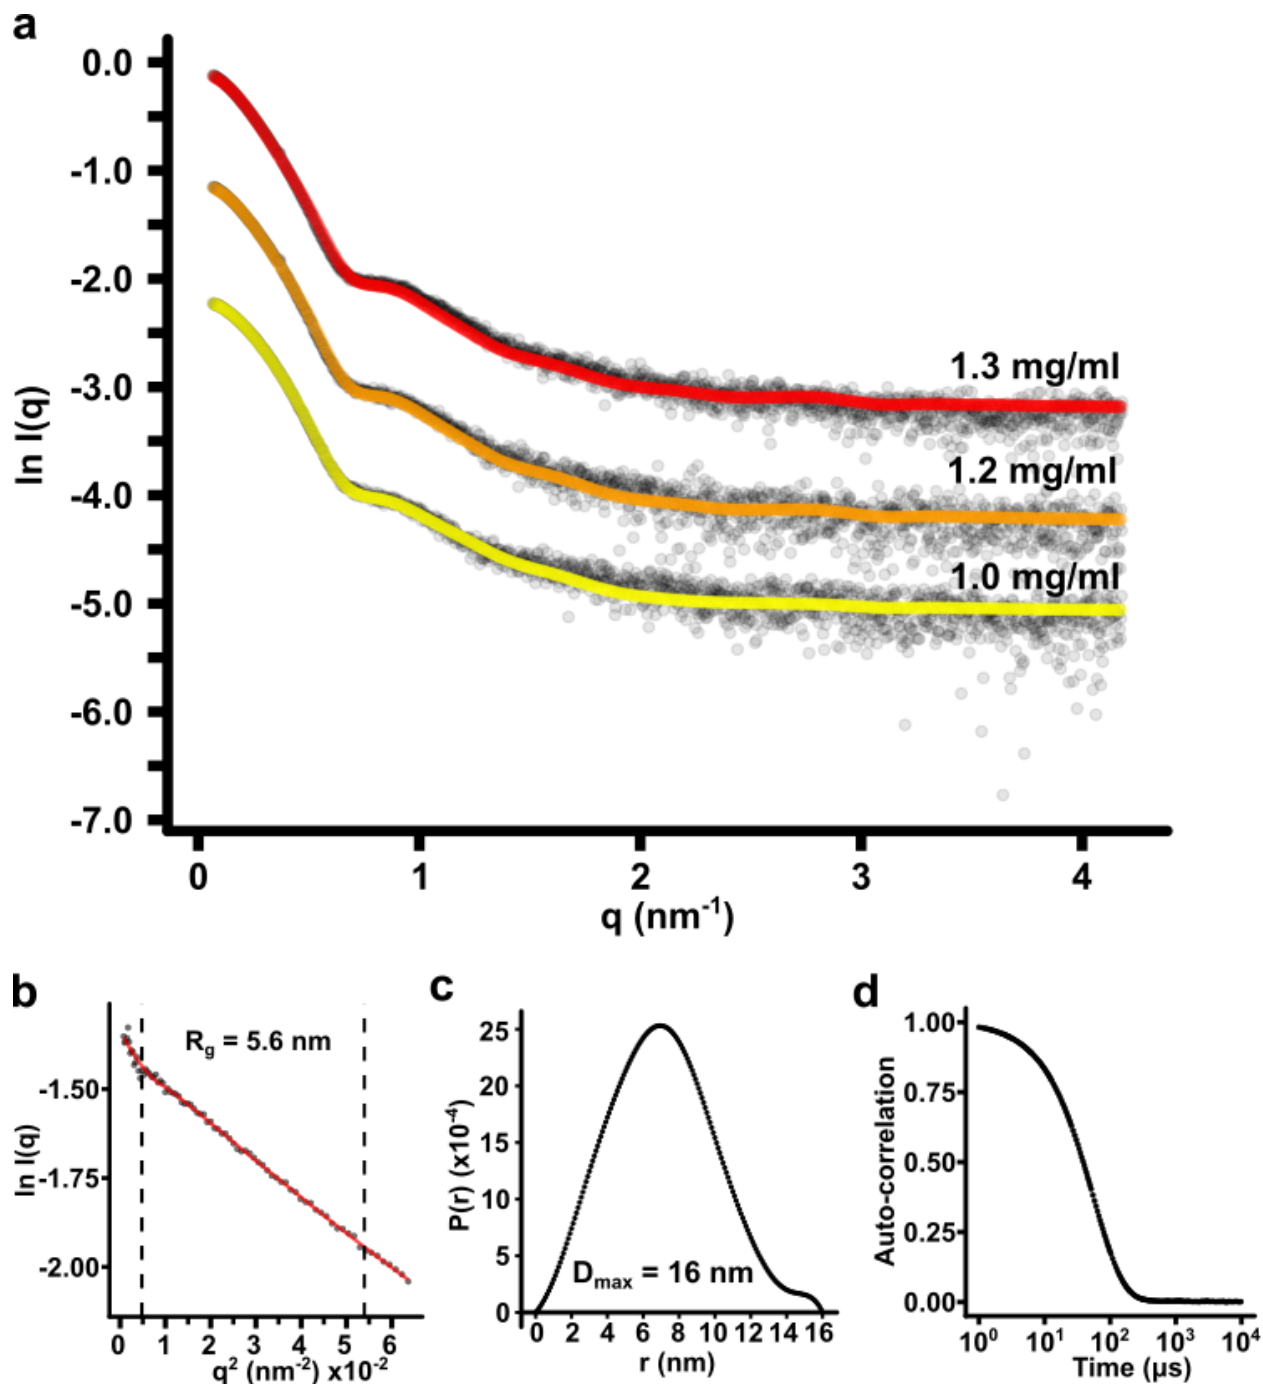

**Supplementary Fig. 1. Biophysical characterization of the AENTH assembly in solution. a.** Experimental SAXS data of the 16-mer assembly ( $A_8E_8$ ) in presence of 200  $\mu\text{M}$  PIP<sub>2</sub>. The red, orange and yellow lines represent the fittings from OLIGOMER using a mixture population of monomers (ANTH & ENTH) and oligomers (16-mer and 32-mer). The contributions of monomer, 16-mer and 32-mer are: 0.09, 0.39, 0.52 for the curve at 1.3 mg/ml ( $\chi^2 = 3.81$ ); 0.08, 0.47, 0.42 for the curve at 1.2 mg/ml ( $\chi^2 = 1.81$ ); and Lizarrondo et. al., 2021

0.15, 0.58, 0.27 for the curve at 1 mg/ml ( $\chi^2=1.44$ ). **b.** Guinier plot for calculation of the  $R_g$  of the SAXS curves. **c.** Distance-distribution function obtained from the SAXS curves. **d.** DLS auto-correlation curve for the sample used for cryo-EM. The approximate hydrodynamic radius of the sample was 9 nm.

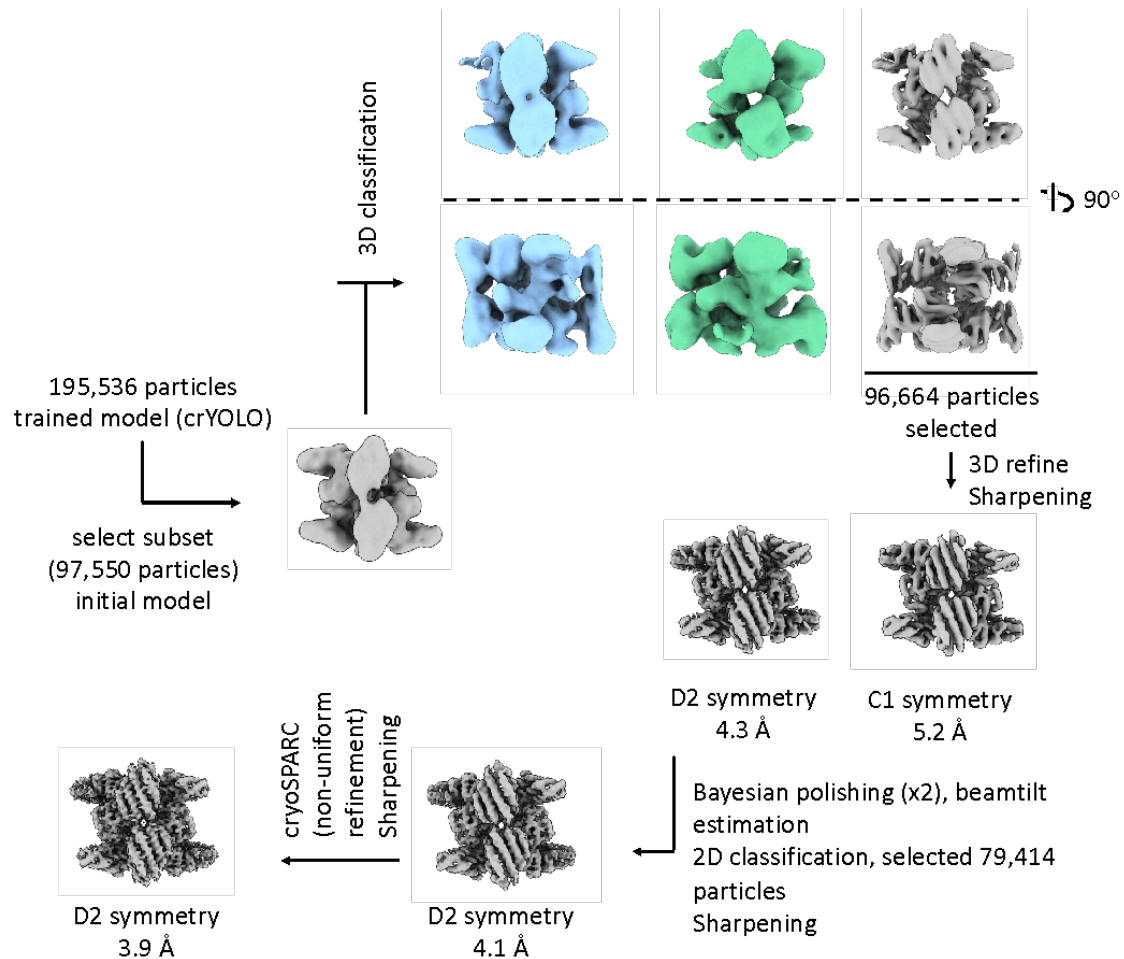

**Supplementary Fig. 2. Processing flowchart for the 16-mer AENTH complex.**

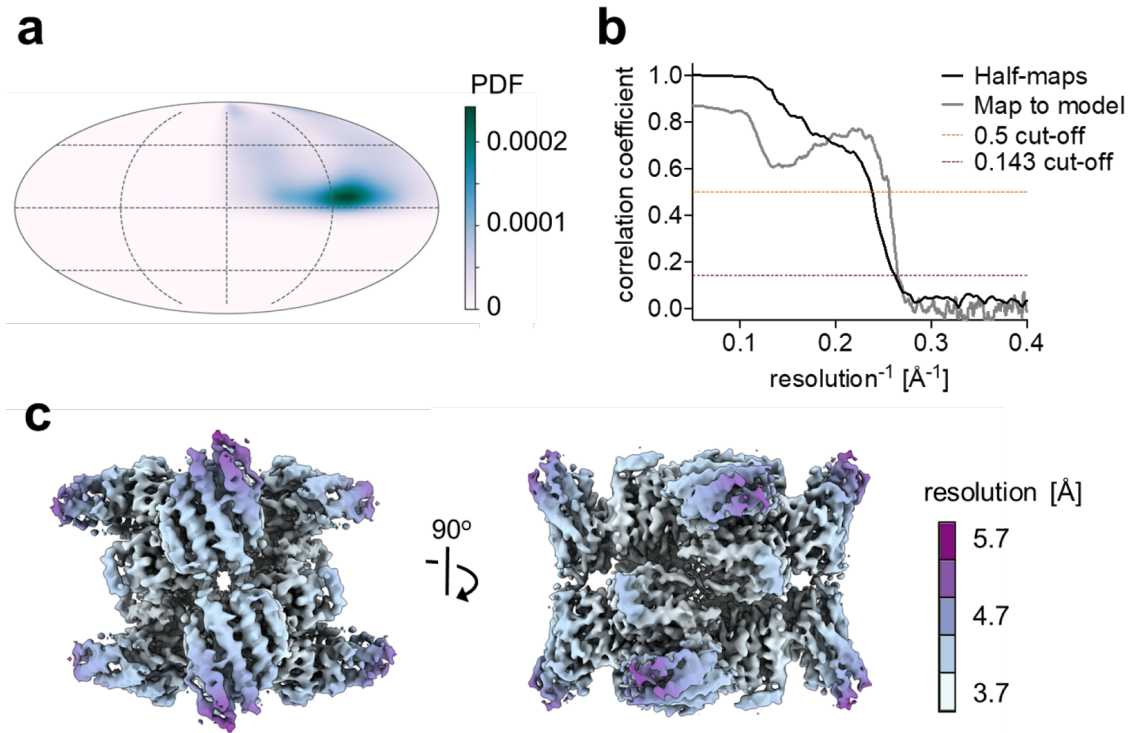

**Supplementary Fig. 3. Cryo-EM reconstruction.** **a.** Angular distribution (PDF = Probability density function). **b.** Fourier Shell Correlation (FSC) curves and **c.** local resolution for the AENTH 16-mer complex.

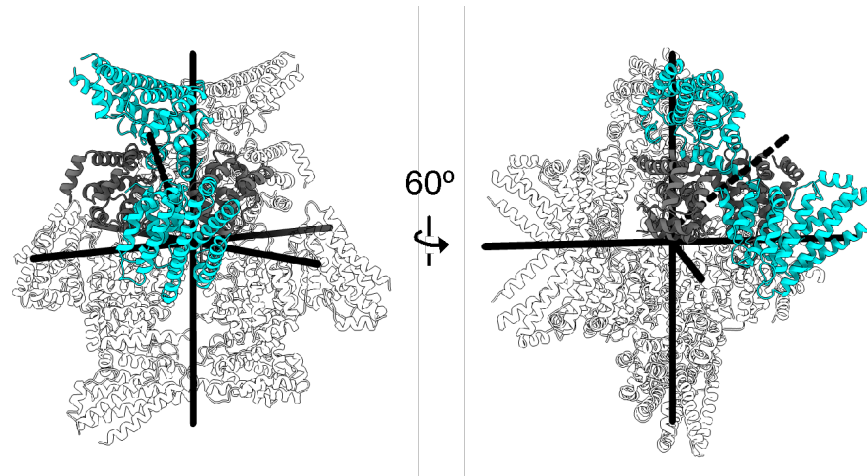

**Supplementary Fig. 4. Symmetry of the 16-mer complex.** Structure of 16-mer AENTH (A<sub>8</sub>E<sub>8</sub>) complex with symmetry axes indicated by black solid lines. ANTH and ENTH subunits of one asymmetric unit (tetramer) are shown in cyan and grey, respectively. The pseudo-2fold axis within the tetramer is shown as dashed black line.

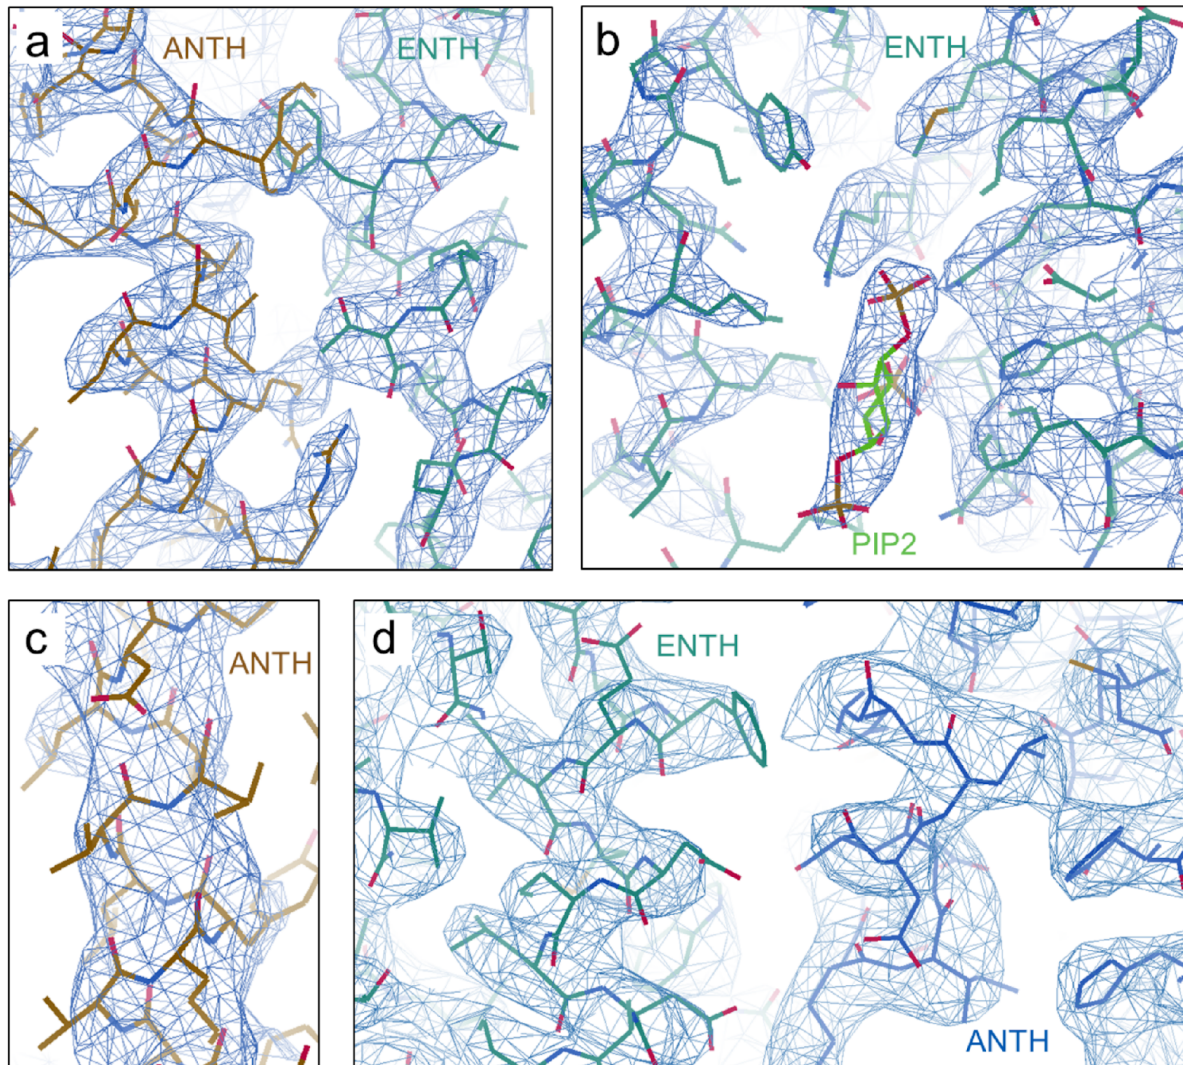

**Supplementary Fig. 5. Representative EM densities.** **a.** Well-resolved central alpha-helical parts of the ANTH-ENTH complex. **b.** One of the PIP<sub>2</sub>-binding sites between two ENTH domains **c.** Lower resolution at the periphery of the complex in the last alpha helix of the ANTH domain and **(d)** the ANTH-ENTH interface 2.

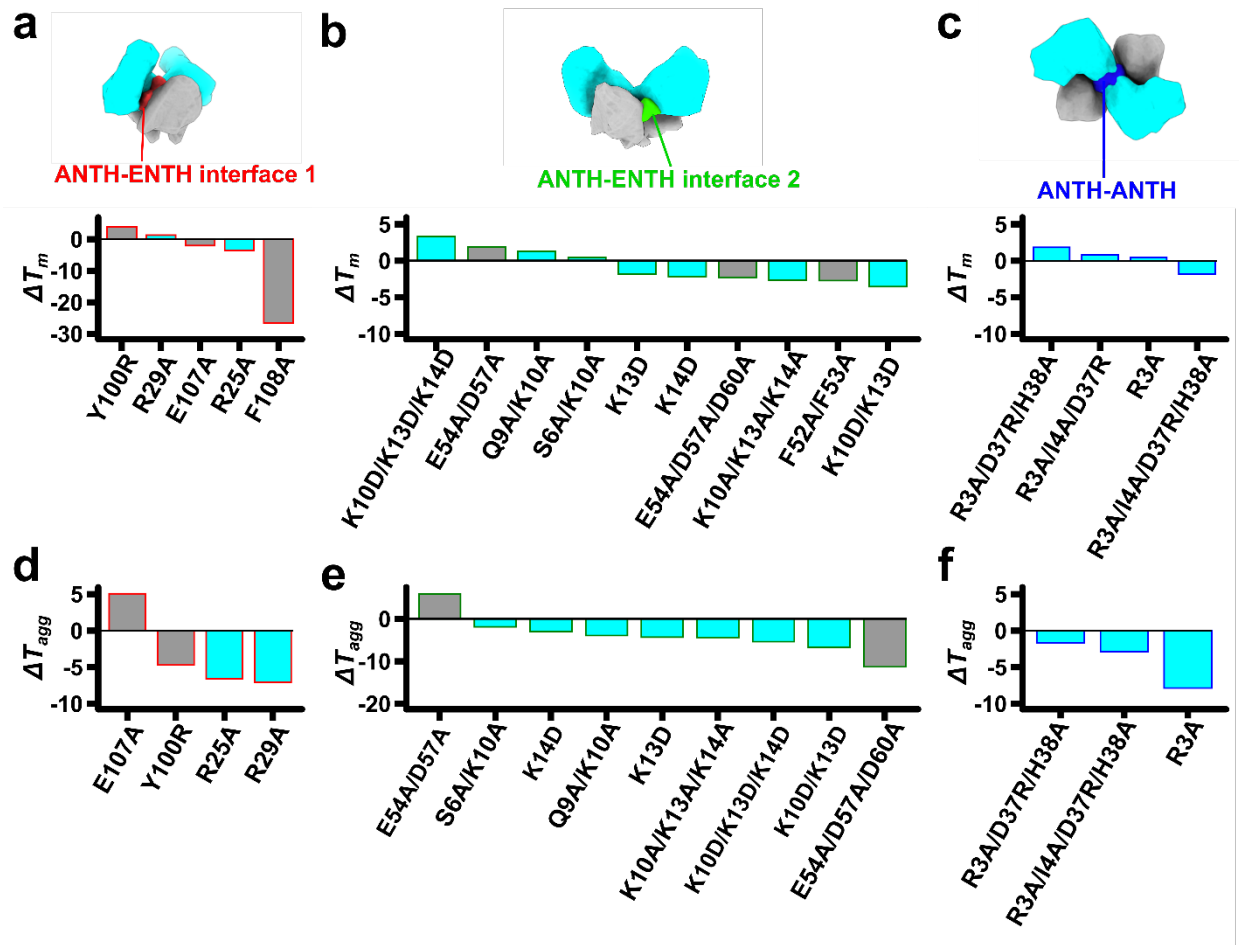

**Supplementary Fig. 6. nanoDSF data for the ANTH and ENTH mutants affecting ANTH-ENTH interface 1 (red), ANTH-ENTH interface 2 (green) and ANTH-ANTH interface (blue) (a, b and c):** Difference in melting temperature ( $T_m$ ) between mutant domains compared to ANTH wt (cyan) or ENTH wt (grey). The  $T_m$  was obtained from the fluorescence signal ratio 350/330 nm. All domains with a  $\Delta T_m$  higher than 2 °C were not further considered for complex assembly experiments. **(d, e and f):** Difference in the mid-aggregation temperature ( $T_{agg}$ ) from AENTH complexes assembled with different mutant domains (ANTH mutant + ENTH wt, cyan and ENTH mutant + ANTH wt, grey) compared to AENTH wt.  $T_{agg}$  was obtained from the scattering signal of the nanoDSF melting experiments. Most mutants showed a lower aggregation temperature when compared with wild-type complex.

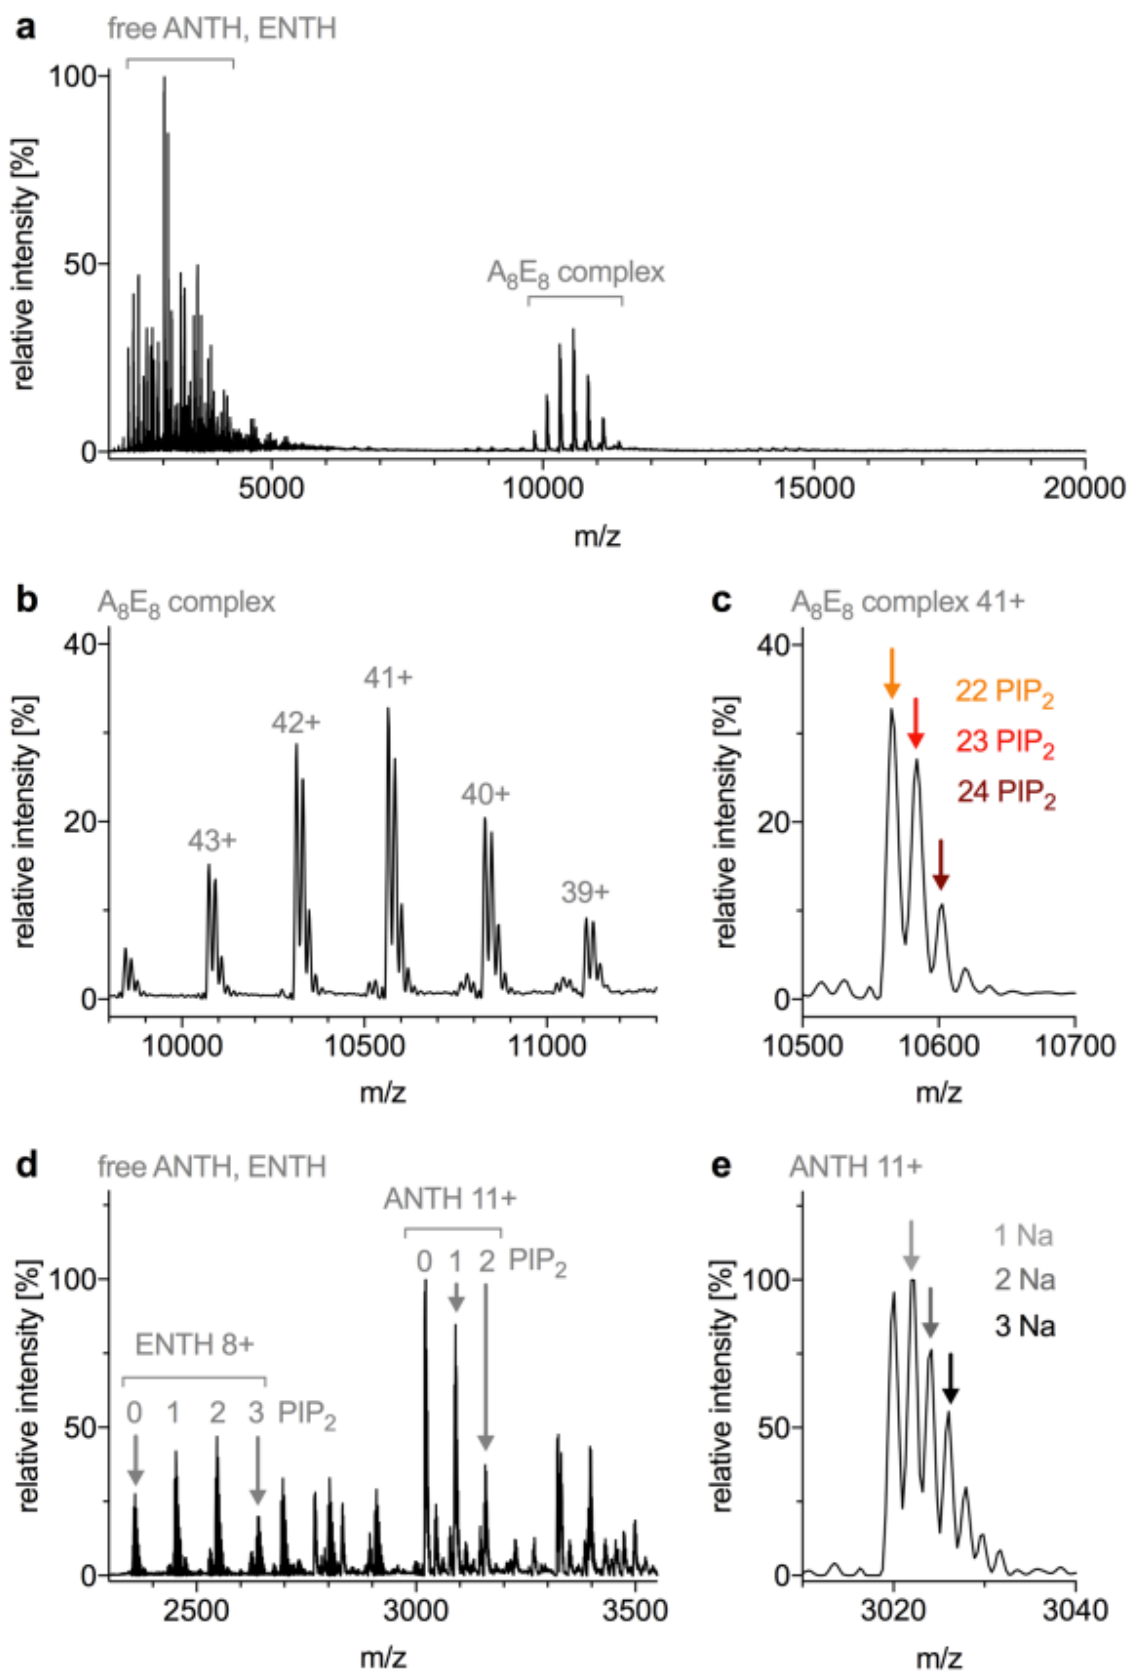

**Supplementary Fig 7. Native MS of the AENTH WT complex in the presence of 60  $\mu$ M PIP<sub>2</sub>.** **a.** Full m/z range of the spectrum. The presence of free ANTH and ENTH is observed at low m/z while the complex appears around 10500 m/z. **b.** Charge state distribution of the A<sub>8</sub>E<sub>8</sub> 8:8 ANTH/ENTH complex with individual charge states labelled **c.** Close up of the 41+ charge state of the A<sub>8</sub>E<sub>8</sub> 8:8 ANTH/ENTH complex showing different numbers of PIP<sub>2</sub> molecules bound to the complex (22, 23 and 24 are clearly distinguishable). **d.** Close up of the spectrum at lower m/z where ENTH bound to 0-3 PIP<sub>2</sub> molecules and ANTH bound to 0-2 PIP<sub>2</sub> molecules can be observed. **e.** Peak fine structure of the ANTH (no PIP<sub>2</sub>) 11+ charge state shows adducts with 1, 2 and 3 Na<sup>+</sup> molecules.

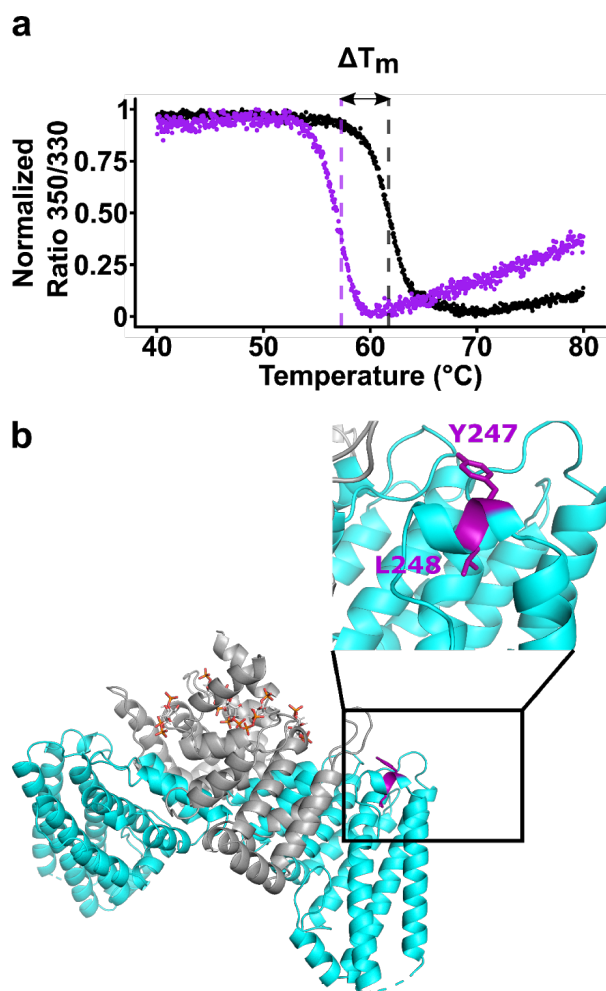

**Supplementary Fig. 8. Sla2 Y247-L248 insertion is not part of the AENTH interface.** **a.** nanoDSF data for ANTH wt (black,  $T_m = 61.7$  °C) and ANTH  $\Delta Y247/L248$  (violet,  $T_m = 57.7$  °C). The shift in the transition of the nanoDSF signal can be clearly observed and is indicated as  $\Delta T_m$ , indicating that this mutation destabilizes the protein. The  $T_m$  was obtained from the fluorescence signal ratio 350/330 nm. **b.** Residues Y247 and L248 of ANTH domain did not establish any contacts in the AENTH complex. Cartoon representation of the AENTH tetramer and the PIP<sub>2</sub> molecules bound to it, with the YL residues colored in violet. The insert shows the detailed orientation of these residues, which does not establish any protein-protein contacts. Deletion of these residues disrupts helix  $\alpha 12$ .

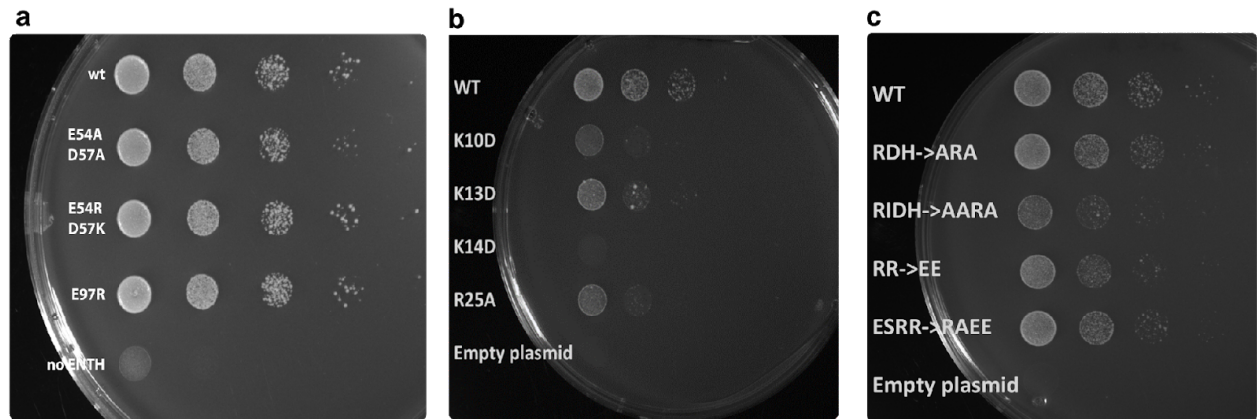

**Supplementary Fig. 9. Growth defects of selected mutants** affecting the ANTH-ENTH interface 2 (**a** and **b**) and the ANTH-ANTH interface (**c**). ANTH wt and ENTH wt domains or indicated interface mutants were expressed after depletion or deletion of endogenous Ent1 and Sla2 proteins, respectively. Cell growth was analysed after plating 10-fold serial dilution of cells on SD-Ura plates and incubation for 3 days at 37 °C. **a.** Mutation of negatively charged residues ENTH E54 and D57 does not introduce a growth defect. **b.** Mutation of single ANTH positively charged residues K10, K13, K14 and R25 impair cell growth. **c.** Growth of mutants of the ANTH-ANTH interface (RDH->ARA, R3A/D37R/H38A, RIDH-> AARA, R3A/I4A/D37R/H38A) and the ANTH loop 175-183 (RR->EE, R178E/E178E, ESRR-> RAEE, E57R/S100A/R178E/E178E).

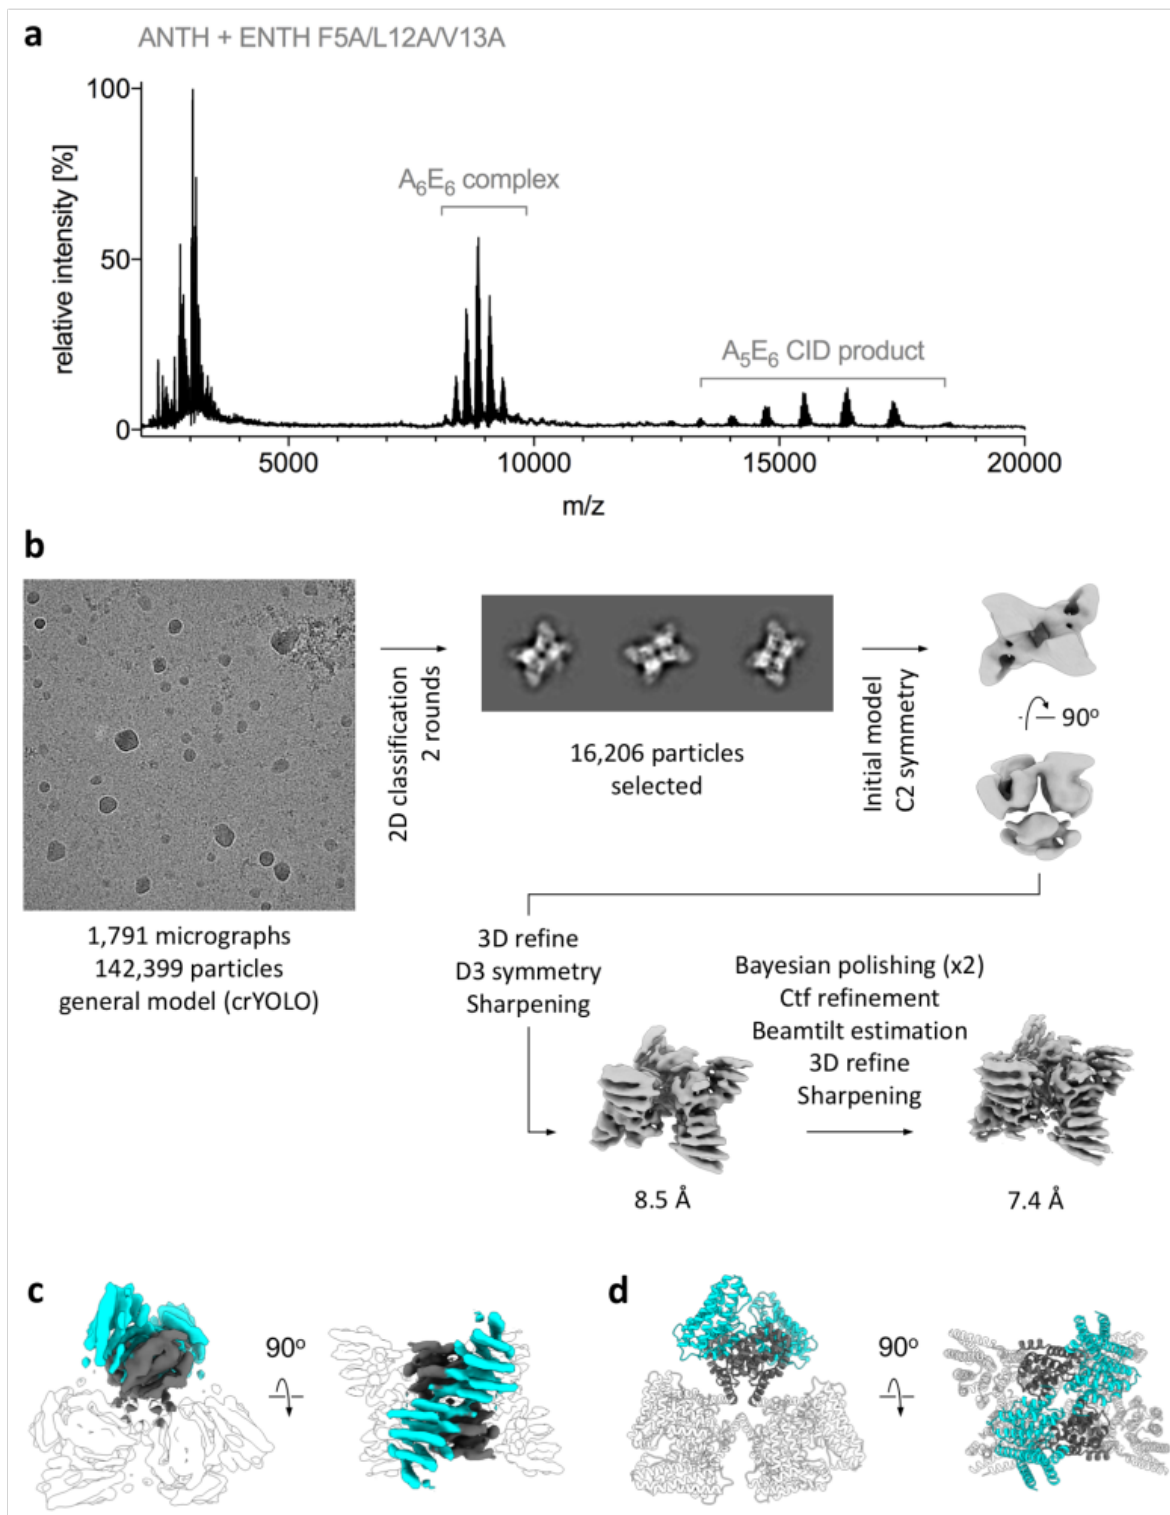

**Supplementary Fig. 10. AENTH 12-mer assembly ( $A_6E_6$ ) obtained by mutation of residues F5A/L12A/V13A of the amphipatic  $\alpha 0$  helix of the ENTH domain. a. Native MS of ANTH in complex**

with ENTH F5A/L12A/V13A at 200  $\mu$ M PIP<sub>2</sub>. The main oligomeric species is the 6:6 AENTH complex. At high m/z, a 5:6 ANTH/ENTH complex is present, resulting from collision induced dissociation (CID) of the 6:6 complex. **b.** Processing flowchart for the 12-mer AENTH complex. **c.** Final density map obtained for the 12-mer assembly with one tetramer coloured in cyan for the ANTH domain and in grey for the ENTH domain. **d.** Structural model for the 12-mer assembly. The tetramer structure (A<sub>2</sub>E<sub>2</sub>) was fitted into the EM density map for each of the three tetramers. The ANTH and ENTH domains are coloured for one of the three tetramers in the same colour code as in **c.**

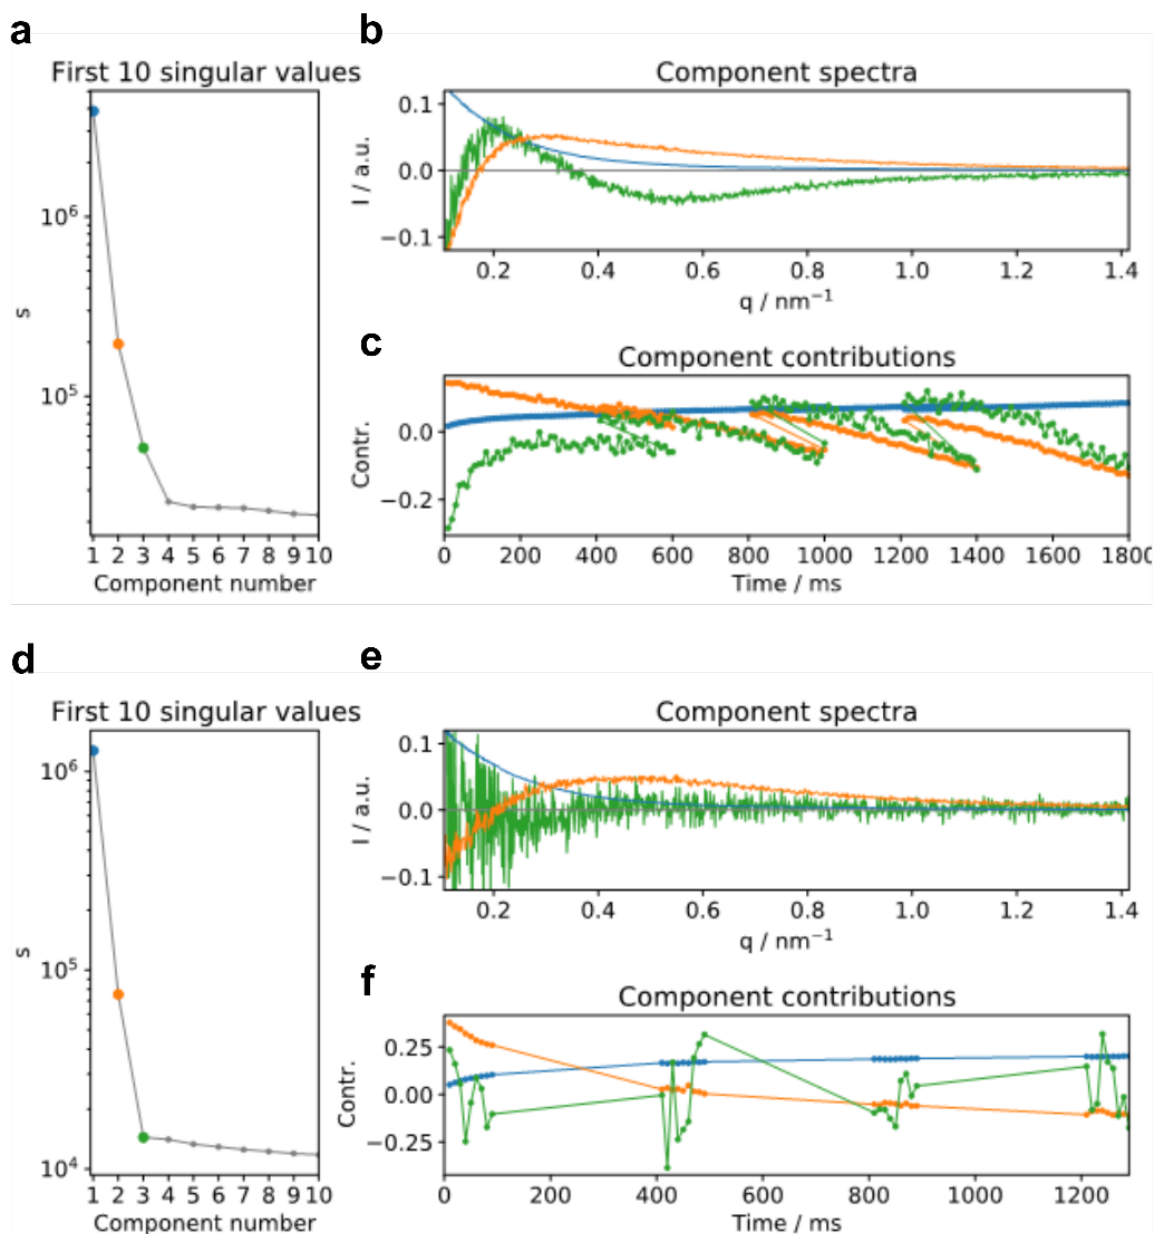

**Supplementary Fig 11. SVD analysis of SF-TR-SAXS.** **a.** SVD analysis of the full dataset revealed 3 components present. **b.** SAXS spectra of the three components. **c.** Component contribution over time of the SVD analysis using the full dataset. **d.** SVD analysis of the dataset using the first 10 points after beam exposure reveals two major components. **e.** SAXS spectra of the three first components. **f.** Component contributions over time of the SVD analysis using the first 10 points after beam exposure.

**a**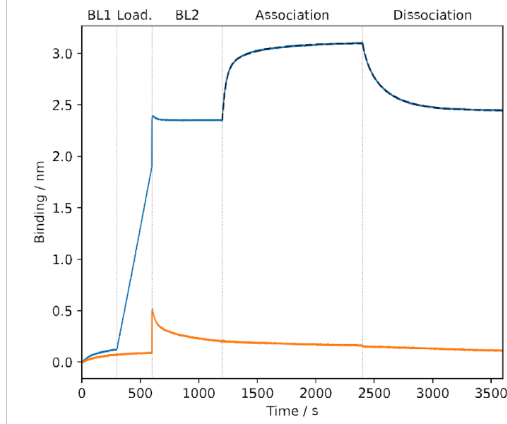**b**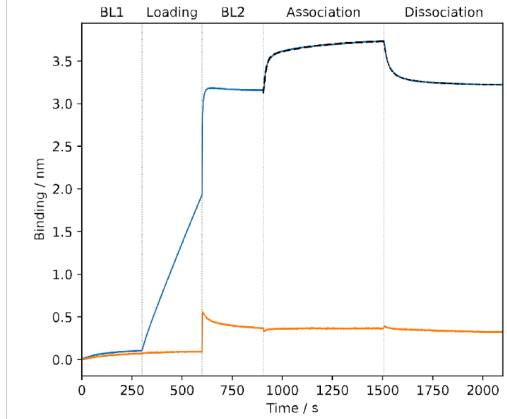

**Supplementary Fig. 12. AENTH complex formation is a reversible process.** Binding kinetics measured by biolayer interferometry (BLI) between His-tagged ANTH (**a**) or ENTH (**b**) immobilized on a Ni-NTA Octet sensor (load stage performed at 3.7  $\mu\text{g/ml}$  monomeric protein) in the presence of 0.25  $\mu\text{M}$  free ENTH (**a**) or ANTH (**b**) (blue curves) and without ligand (orange curves). All steps were done in 50 mM Tris HCl pH 8.0, 125 mM NaCl and 0.05% BSA. For baseline 2 (BL2), association and dissociation stages the buffer additionally contained 170  $\mu\text{M}$  DDM and 50  $\mu\text{M}$  PIP<sub>2</sub>. See Table 3 for the kinetic constants.

**Supplementary Table 1. ANTH-ENTH complexes measured by DLS**

| ANTH           | ENTH           | Radius (nm) | %Pd   | Mw-R (kDa) | %Intensity | %Mass | %Number |
|----------------|----------------|-------------|-------|------------|------------|-------|---------|
| WT             | WT             | 9.6         | 11.85 | 664.6      | 100        | 100   | 0       |
| R25A           | WT             | 2.9         | 8.85  | 41.9       | 1.8        | 64.0  | 99.0    |
|                |                | 8.2         | 8.56  | 468.1      | 9.7        | 15.2  | 1.0     |
| R29A           | WT             | 2.5         | 15.06 | 29.3       | 11.1       | 90.6  | 99.6    |
|                |                | 7.2         | 14.29 | 343.9      | 22.2       | 7.7   | 0.4     |
| WT             | Y100R          | 2.7         | 0     | 33.3       | 15.2       | 78.5  | 98.1    |
|                |                | 7.2         | 14.81 | 344.4      | 71.3       | 21.3  | 1.9     |
| WT             | E107A          | 3.1         | 4.61  | 47.2       | 3.2        | 29.8  | 78.0    |
|                |                | 7.1         | 16.06 | 331.7      | 76.6       | 68.2  | 22.0    |
| WT             | E54A/D57A/D60A | 7.5         | 26.06 | 374        | 100        | 100   | 100     |
| S6A/K10A       | WT             | 6.7         | 6.86  | 287.7      | 93.8       | 99.4  | 100     |
| K13D           | WT             | 7.2         | 10.19 | 344.6      | 100        | 100   | 100     |
| Q9A/K10A       | WT             | 8           | 11.18 | 433.9      | 96.8       | 99.2  | 100     |
| K10A/K13A/K14A | WT             | 8.5         | 16.31 | 508        | 90.7       | 28.4  | 1.6     |
| WT             | E54A/D57A      | 3.3         | 11.49 | 55.8       | 3.5        | 73.1  | 99.5    |
|                |                | 9.7         | 8.91  | 684.9      | 9.5        | 8.2   | 0.5     |
| K10D/K13D/K14D | WT             | 3.2         | 12.67 | 51.4       | 39.8       | 99.9  | 100     |
| R3A            | WT             | 2.5         | 9.08  | 28.9       | 9.9        | 79.1  | 99.3    |
|                |                | 8.1         | 6.85  | 454.0      | 89.0       | 20.8  | 0.7     |
| R3A/I4A/D37A   | WT             | 8.3         | 9.15  | 479.8      | 100        | 100   | 100     |
| R3A/D37R/H38A  | WT             | 7.5         | 9.83  | 380.4      | 94.8       | 99.2  | 100.0   |
| K10D/K13D      | WT             | 7.5         | 40.8  | 381.3      | 100        | 100   | 100     |
| K14D           | WT             | 7.4         | 24.5  | 358.9      | 89         | 99    | 100     |
| WT             | F5A/I12A/V13A  | 8           | 11.62 | 436        | 100        | 100   | 100     |
| ΔY247/L248     | WT             | 9           | 36.27 | 571.8      | 100        | 100   | 100     |

**Supplementary Table 2: Data collection and processing parameters for the AENTH 12-mer assembly (ANTH WT, ENTH F5A/L12A/V13A).**

| <b>Data collection and processing</b>               |                |
|-----------------------------------------------------|----------------|
| Magnification                                       | ×75,000        |
| Voltage (kV)                                        | 300            |
| Electron exposure (e <sup>-</sup> /Å <sup>2</sup> ) | 72.6           |
| Defocus range (μm)                                  | -1.5 to -4.2   |
| Pixel size (Å)                                      | 1.065          |
| Symmetry imposed                                    | D <sub>3</sub> |
| Initial particle images (no.)                       | 142,399        |
| Final particle images (no.)                         | 16,206         |
| Map resolution (Å)                                  | 7.4            |
| FSC threshold                                       | 0.143          |
| Map resolution range (Å)                            | 6.8 to 9.9     |

**Supplementary Table 3. Fitting for the binding kinetics determined by BLI**

| <b>Figure S11 A</b>                                |                                                     |                                                |
|----------------------------------------------------|-----------------------------------------------------|------------------------------------------------|
| <b>Fit rise</b>                                    | <b>Fit decay</b>                                    |                                                |
| $k_{\text{obs1}} : 3.06\text{E}^{-02} \text{ 1/s}$ | $k_{\text{diss1}} : 4.40\text{E}^{-03} \text{ 1/s}$ | $K_{\text{D1}} : 3.14\text{E}^{-08} \text{ M}$ |
| $k_{\text{obs2}} : 3.45\text{E}^{-03} \text{ 1/s}$ | $k_{\text{diss2}} : 1.91\text{E}^{-02} \text{ 1/s}$ | $K_{\text{D2}} : 2.12\text{E}^{-07} \text{ M}$ |
| $R^2 : 0.9989$                                     | $R^2 : 0.9995$                                      |                                                |
| <b>Figure S11 B</b>                                |                                                     |                                                |
| <b>Fit rise</b>                                    | <b>Fit decay</b>                                    |                                                |
| $k_{\text{obs1}} : 7.45\text{E}^{-02} \text{ 1/s}$ | $k_{\text{diss1}} : 6.23\text{E}^{-03} \text{ 1/s}$ | $K_{\text{D1}} : 1.93\text{E}^{-08}\text{M}$   |
| $k_{\text{obs2}} : 3.87\text{E}^{-03} \text{ 1/s}$ | $k_{\text{diss2}} : 4.56\text{E}^{-02} \text{ 1/s}$ | $K_{\text{D2}} : 2.30\text{E}^{-07}\text{M}$   |
| $R^2 : 0.9980$                                     | $R^2 : 0.9981$                                      |                                                |

**Supplementary Table 4. Primers used to produce ANTH and ENTH mutants.**

| PCR primers |                |                                                                               |                                                                                |
|-------------|----------------|-------------------------------------------------------------------------------|--------------------------------------------------------------------------------|
|             | Mutant         | Forward                                                                       | Reverse                                                                        |
| ANTH        | M1A            | cagggcgccatggGATCCgcgAGCCGTATCGATTCTGACCTGCAG                                 | CTGCAGGTCAGAATCGATACGGCTcgcGGATCccatggcgccctg                                  |
|             | S6A/K10A       | catggGATCCATGAGCCGTATCGATgCgGACCTGCAGgcgGCGCTCAAAAAAGCCTGTTCGTTG              | CAACGGAACAGGCTTTTTTGAGCGCcgC TGCAGGTCcGcATCGATACGGCTCATGGA TCcatg              |
|             | Q9A/K10A       | CCATGAGCCGTATCGATTCTGACCTGgcgccGCGCTCAAAAAAGCCTGTTCCGTTGAG G                  | CCTCAACGGAACAGGCTTTTTTGAGCGCg gccgcCAGGTCAGAATCGATACGGCTCATG G                 |
|             | K13D           | GATTCTGACCTGCAGAAAGCGCTCgatAAAGCCTGTTCCGTTGAGGAAACCG                          | CGGTTTCCTCAACGGAACAGGCTTTatcGAGCGCTTTCTGCAGGTCAGAATC                           |
|             | R3A/I4A        | ctttatcttcagggcgccatggGATCCATGAGCgcggccGATTCTGACCTGCAGAAAGCGCTC               | CGGTGCGGTTTCCTCAACGGAACAGGCcg cggcGAGCGCggcCTGCAGGTCAGAATCGA TACGGC            |
|             | ΔY247/L248     | GTTTTACGCGGATTGCTCCTCTGTGAAAA CCACGCTGGTTACCATTCAAAACTGC                      | GCAGTTTTGGAATGGTAACCAGCGTGGT TTTCACAGAGGAGCAATCCGCGTAAAAAC                     |
|             | K10A/K13A/K14A | GCCGTATCGATTCTGACCTGCAGgccGCGC TCgccgcGCTGTTCCGTTGAGGAAACCGC ACCG             | CGGTGCGGTTTCCTCAACGGAACAGGCcg cggcGAGCGCggcCTGCAGGTCAGAATCGA TACGGC            |
|             | K10D/K13D/K14D | GCCGTATCGATTCTGACCTGCAGgacGCGC TCgatgacGCCTGTTCCGTTGAGGAAACCGC ACCG           | CGGTGCGGTTTCCTCAACGGAACAGGCgt catcGAGCGCgtcCTGCAGGTCAGAATCGAT ACGGC            |
|             | K10D/K13D      | CTGACCTGCAGgacGCGCTCgatAAAGCCTG TTCCGTTGAGGAAACCG                             | CGGTTTCCTCAACGGAACAGGCTTTatcGAGCGCgtcCTGCAGGTCAG                               |
|             | K14D           | CTGACCTGCAGAAAGCGCTCAAAGacGCC TGTTCGTTGAGGAAACCGC                             | GCGGTTTCCTCAACGGAACAGGCgtcTTTG AGCGCTTTCTGCAGGTCAG                             |
|             | R3A            | cagggcgccatggGATCCATGAGCgcgATCGATTCTGACCTGCAGAAAGC                            | GCTTTCTGCAGGTCAGAATCGATcgcGCTC ATGGATCccatggcgccctg                            |
|             | R25A           | GTTGAGGAAACCGCACCGAAAgcgAAACA CGTACGTGCATGCATTGTGTAC                          | GTACACAATGCATGCACGTACGTGTTTcg cTTTCGGTGCGGTTTCCTCAAC                           |
|             | R29A           | CCGCACCGAAACGCAAAACAGTAgcgGCA TGCATTGTGTACACCTGGG                             | CCCAGGTGTACACAATGCATGCcgTACG TGTTTGCGTTTCGGTGCGG                               |
| ENTH        | E54A/D57A/D60A | CTACGACAGCGCAGACTTCTTTGcGATCA TGGcgATGCTGGcgAAACGCCTGAACGAC AAAGGC            | GCCTTTGTGCTTCAGGCGTTTcgCCAGCAT cgCCATGATCgCAAAGAAGTCTGCGCTGT CGTAG             |
|             | Y100R          | GTA CTGTGGTGCCGTGAGAACCTGcgtATC ATCAAAACCCTGAAAGAG                            | CTCTTTCAGGGTTTTGATGATagcCAGGTT CTCACGGCACCAAGTAC                               |
|             | F108A          | CATCATCAAAACCCTGAAAGAGgcgCGTC ACGAAGACGATGAGGGTATTG                           | CAATACCCTCATCGTCTTCGTGACGcgCCT CTTTCAGGGTTTTGATGATG                            |
|             | E107A          | GTACATCATCAAAACCCTGAAAGcGTTCC GTCACGAAGACGATGAGGG                             | CCCTCATCGTCTTCGTGACGGAACgCTTT CAGGGTTTTGATGATGTAC                              |
|             | E54A/D57A      | CGACAGCGCAGACTTCTTTGcGATCATGG cgATGCTGGACAAACGCCTGAAC                         | GTTTCAGGCGTTTGTCCAGCATcgCCATGA TCgCAAAGAAGTCTGCGCTGTCTG                        |
|             | F52A/F53A      | GAAAAGCTACGACAGCGCAGACgcgcgGA GATCATGGACATGCTGGAC                             | GTCCAGCATGTCCATGATCTCgcccgcGTCT GCGCTGTCTAGCTTTTC                              |
|             | F5A/L12A/V13A  | ccatggGATCCATGTCTAAACAGgcgGTGCGT TCCGCGAAAAACgCGGcGAAAGGTTATTC CTCTACCCAGGTAC | GTACCTGGGTAGAGGAATAACCTTTTCgCC gcGTTTTTCGCGGAACGCACcgCCTGTTTA GACATGGATCccatgg |
